# Supplementary material for: Oxidation of Tiron by (pyrophosphato)manganese(iii). Kinetics and mechanism
Source: Royal Society of Chemistry journal article supplement (doi:10.1039/b204678d), 2002-01-01
Supplement: b204678d-1.doc [file b204678d-1.doc]

Paper Ref. B204678D (E-submission Web Password 328313)

Title: Oxidation of tiron by pyrphosphatomanganese(III). Kinetics and mechanism

Authors: I. Bozor and L.I. Simandi

**Table S1** Dependence of the first order rate constant kobs (s-1) on the Tiron concentration at different pH’s. Conditions: = 370 nm, [Mn]o =1.5 mM; P2O74- = 15 mM, T = 25oC, I = 0.5 M.

Each value is the average of 3 runs reproducible to within  3%

| To / M | k obs (pH 2.4) | k obs (pH 3.17) | k obs (pH 3.70) |
| --- | --- | --- | --- |
| 3.5 | 131 | -- | 55.2 |
| 7.0 | 274 | 202 | 113 |
| 10 | 361 | 285 | 164 |
| 14 | 534 | 404 | 232 |
| 18 | 690 | -- | 301 |
| 20 | -- | 573 | -- |
|  | -- | -- | -- |
|  | 1.91x104 a | 1.43 x104 a | 8.36 x103 a |

a Second order rate constant (*k* / M-1s-1 ) calculated from the slope

of the kobs *vs* To straight line
